# Supplementary material for: Facile fabrication of composite cellulose fibrous materials for efficient and consecutive dyeing wastewater treatment
Source: Royal Society of Chemistry journal article supplement (doi:10.1039/d2ra03460c), 2022-01-01
Supplement: d2ra03460c1.pdf [file d2ra03460c1.pdf]

## Supplementary Information for

### **Facile fabrication of composite cellulose fibrous materials for efficient and consecutive dyeing wastewater treatment**

Dandan Xie,<sup>a</sup> Qiuxia Fu,<sup>\*ab</sup> Yue Wang,<sup>a</sup> Jianlong Ge,<sup>ab</sup> Hailou Wang,<sup>ab</sup> Yu Zhang,<sup>ab</sup>

Wei Zhang<sup>\*ab</sup> and Haoru Shan<sup>\*a,b</sup>

a. College of Textile and Clothing, Nantong University, Nantong, Jiangsu 226019,  
China

b. National & Local Joint Engineering Research Center of Technical Fiber  
Composites for Safety and Health, Nantong University, Nantong, Jiangsu 226019,  
China

\*Corresponding authors: Prof. Qiuxia Fu (fuqx@ntu.edu.cn), Prof. Wei Zhang  
(zhangwei@ntu.edu.cn), and Prof. Haoru Shan (hrshan@ntu.edu.cn)

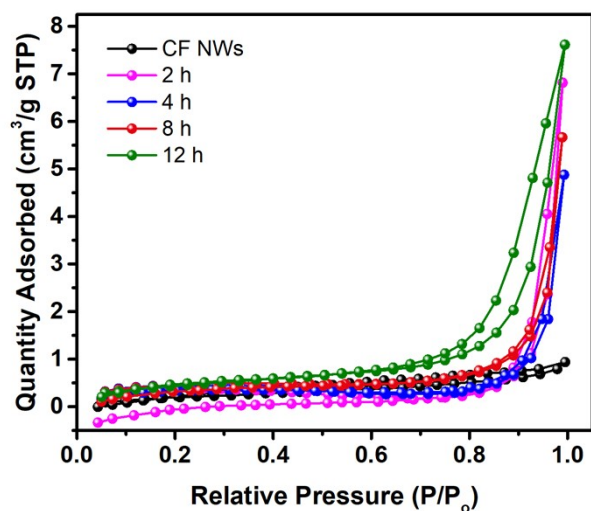

**Fig. S1.** N<sub>2</sub> adsorption-desorption isotherms of the initial CF NWs and the PDA@CF NWs obtained from different modification time ranging from 2 to 12 h (fixed DA concentration of 1.0 mg mL<sup>-1</sup>).

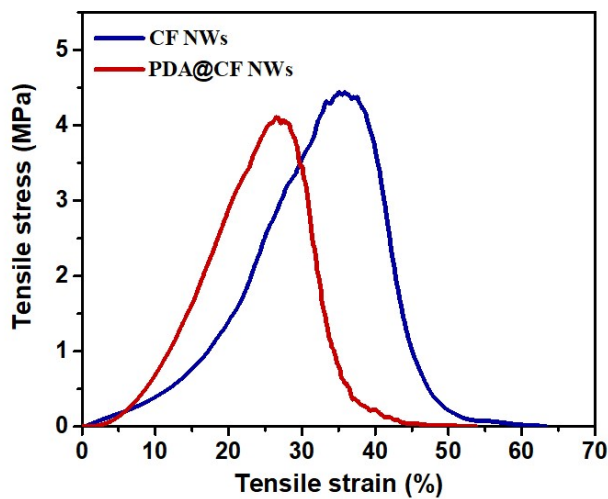

**Fig. S2.** Tensile strength of the initial CF NWs and the resulting PDA@CF NWs fabricated by different DA concentrations of 1.0 mg mL<sup>-1</sup> and polymerization modification time of 8 h.

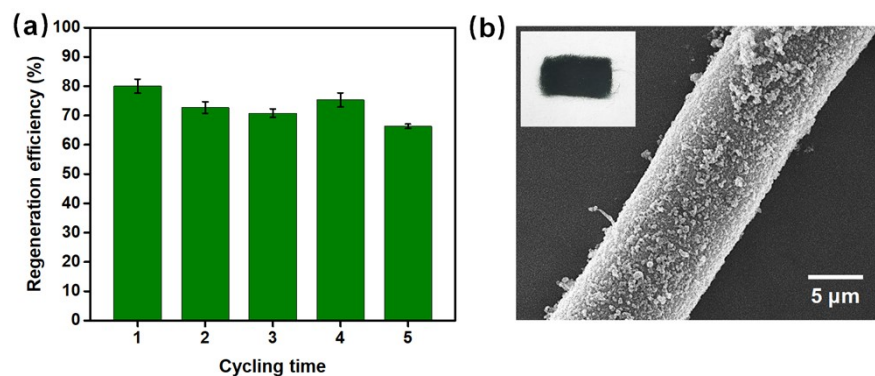

**Fig. S3.** (a) Regeneration efficiency of MB adsorption capacity of the PDA@CF NWs. (b) Photograph and SEM image of the PDA@CF NWs after cyclic adsorption.

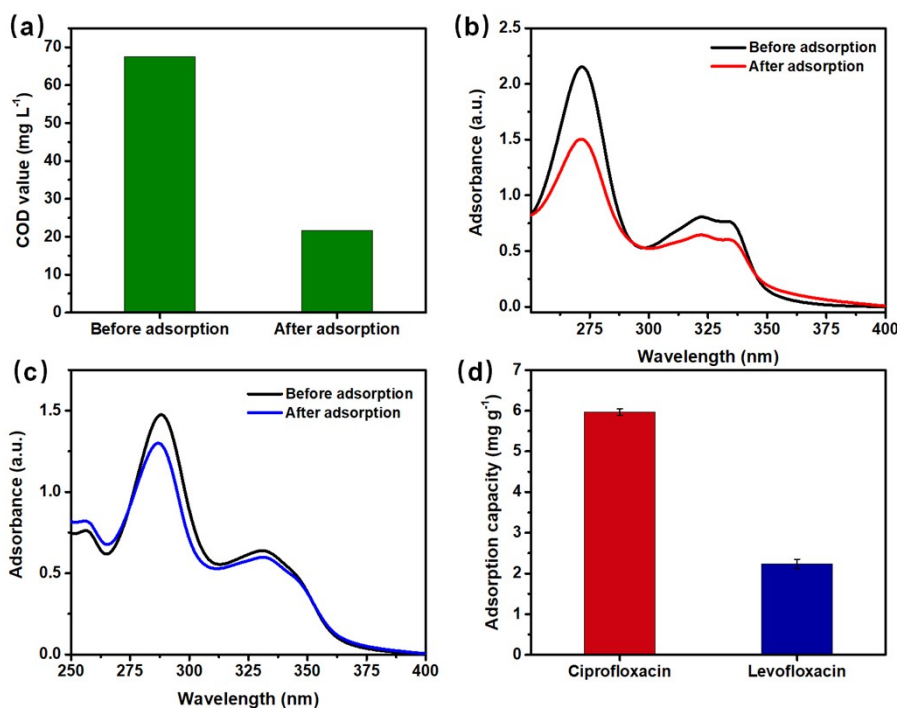

**Fig. S4.** (a) COD value of the MB solution before and after static adsorption by the proposed composite cellulose fibrous materials. UV-Vis spectrum of the (b) ciprofloxacin and (c) levofloxacin solution at the concentration of 20 mg L<sup>-1</sup> before and after static adsorption by PDA@CF NWs. (d) The corresponding adsorption capacity of PDA@CF NWs towards ciprofloxacin and levofloxacin.

**Table S1.** Textural parameters including BET surface area, BJH desorption average pore diameter, and pore volume of the CF NWs and the PDA@CF NWs obtained from different modification time (fixed DA concentration of 1.0 mg mL<sup>-1</sup>).

| Sample          | BET surface area (m <sup>2</sup> g <sup>-1</sup> ) | Average pore diameter (nm) | Pore volume (cm <sup>3</sup> g <sup>-1</sup> ) |
|-----------------|----------------------------------------------------|----------------------------|------------------------------------------------|
| CF NWs          | 0.841                                              | 6.515                      | 0.0015                                         |
| PDA@CF NWs-2 h  | 1.188                                              | 32.164                     | 0.0105                                         |
| PDA@CF NWs-4 h  | 1.295                                              | 30.669                     | 0.0075                                         |
| PDA@CF NWs-8 h  | 1.601                                              | 29.214                     | 0.0087                                         |
| PDA@CF NWs-12 h | 1.671                                              | 19.469                     | 0.0118                                         |

**Table S2.** Comparison of adsorption capability of the PDA@CF NWs to those of other fibrous dye adsorbents.

| Substrate                                            | Modified material              | Adsorption equilibrium time (h) | Adsorption capacity (mg g <sup>-1</sup> ) | Reference |
|------------------------------------------------------|--------------------------------|---------------------------------|-------------------------------------------|-----------|
| Cotton                                               | Citric acid                    | 24                              | 49.6                                      | 39        |
| Lignin                                               | 5-sulfosalicylic acid          | 12                              | 83.3                                      | 40        |
| SiO <sub>2</sub> /SnO <sub>2</sub> NFM               | /                              | 0.5                             | 78.6                                      | 41        |
| Hierarchical porous ultrafine alumina fibers (HPAFs) | /                              | 0.5                             | 59.07                                     | 42        |
| Polyester fibers                                     | Glucose carbon microspheres    | 2.5                             | 17.5                                      | 43        |
| Kenaf fibre char                                     | Hydrochloric acid              | 8                               | 17.79                                     | 44        |
| Luffa cylindrica fibers                              | Sodium hydroxide               | 25                              | 49                                        | 45        |
| Data palm fibers                                     | TiO <sub>2</sub> nanoparticles | 2                               | 45.08                                     | 46        |
| Cotton fibers                                        | Caffeic acid/chitosan          | 2.5                             | 38.92                                     | 47        |
| Cellulose nonwovens                                  | PDA                            | 2                               | 90.45                                     | This work |
